# Supplementary material for: Zebrafish Caudal Fin Angiogenesis Assay—Advanced Quantitative Assessment Including 3-Way Correlative Microscopy
Source: PubMed Central journal article supplement (PMC4780710; doi:10.1371/journal.pone.0149281), 2016-03-07
Supplement: pone.0149281.s006.pdf [file pone.0149281.s006.pdf]

**S1 Table. Formulary**

| Full name                 | Abbrev.     | Unit               | Formula                                        | Explanation                                                                                                                                                    |
|---------------------------|-------------|--------------------|------------------------------------------------|----------------------------------------------------------------------------------------------------------------------------------------------------------------|
| Area (stereology)         | TRA,<br>VPA | [mm <sup>2</sup> ] | $Area = N_p * \left(\frac{area}{point}\right)$ | Where $N_p$ is the number of points obtained by counting, area/point= the applied size of the grid (point associated area)<br>dL= distance between grid lines. |
| Length (stereology)       | CL          | [m]                | $Length = N_p * \frac{\pi}{2} * dL$            |                                                                                                                                                                |
| Vessel Area Density       | VAD         | [%]                | $VAD = \frac{VPA}{TRA} * 100$                  |                                                                                                                                                                |
| Average Vessel Diameter   | D           | [μm]               | $d = \frac{2 * VPA}{CL}$                       | Assumptions that vessels are round structures and the diameter of a vessel is smaller than its length.                                                         |
| Vascular Exchange Surface | VES         | [μm <sup>2</sup> ] | $VES = \pi * VPA$                              | We assessed the vascular exchange surface, as the area of the outer surface of the vasculature. Assumption that vessels are cylindric structures.              |
